# Supplementary material
Source: bioRxiv or medRxiv preprint supplement (https://www.biorxiv.org/highwire/filestream/26046/field_highwire_adjunct_files/1/054023-2.pdf)

S1

## Effect Impact

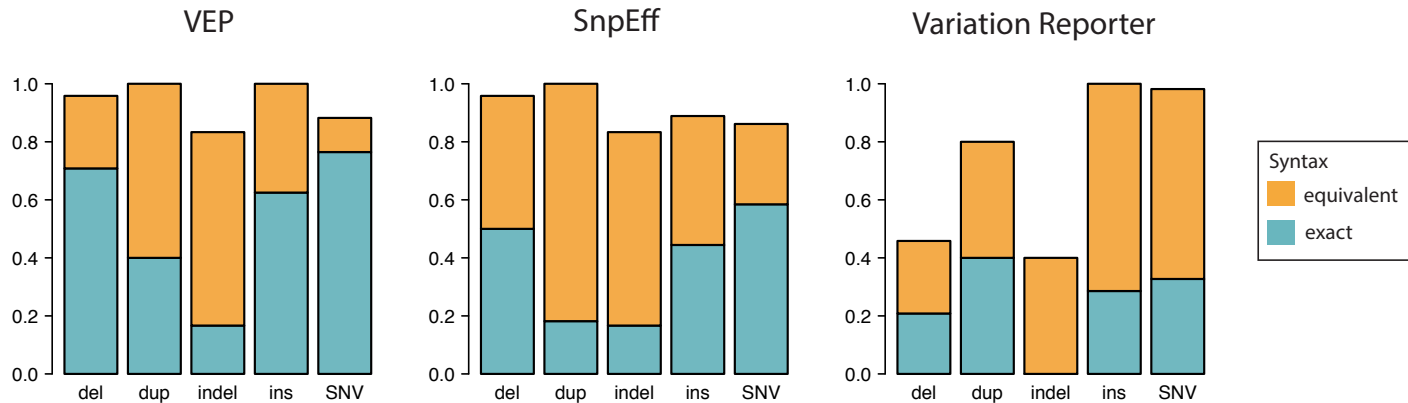

## S2.

### a. ClinVar

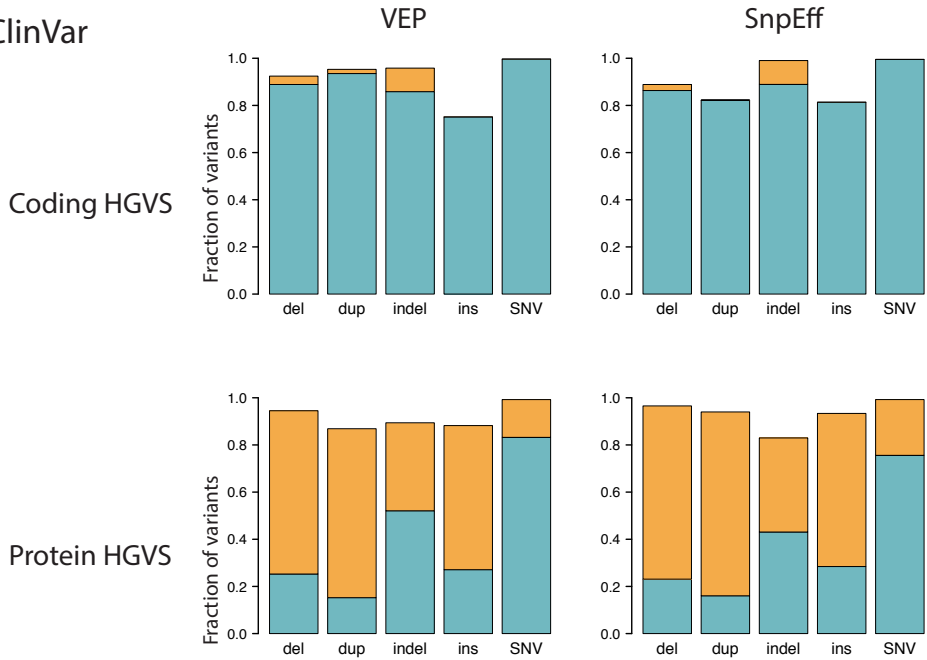

### b. COSMIC

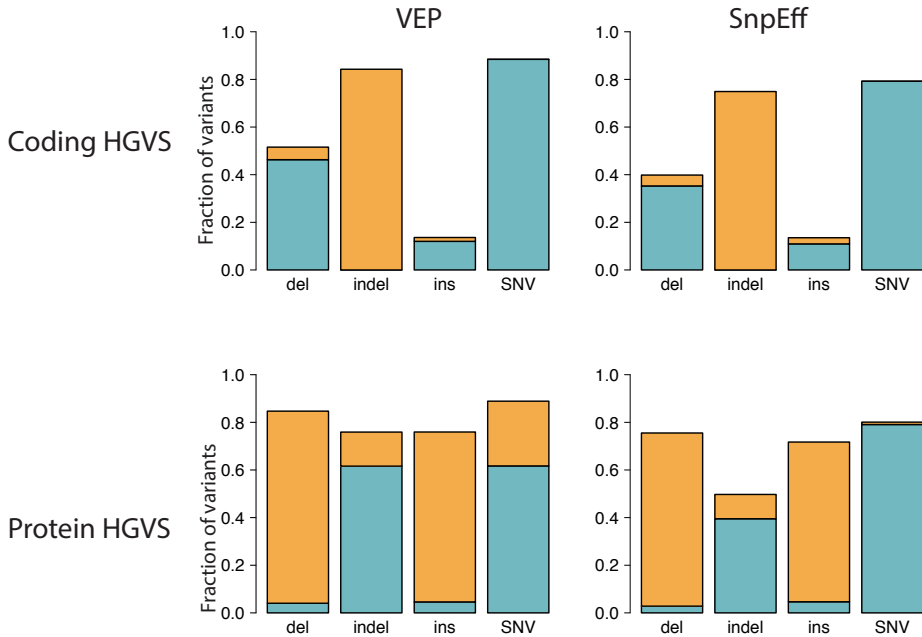

## a. Possible transcripts and nomenclature

| Transcripts    | Coding HGVS | Protein HGVS     |
|----------------|-------------|------------------|
| NM_001126128.1 | c.297dupT   | p.Gly100Trpfs*22 |
| NM_021935.3    | c.234dupT   | p.Gly79Trpfs*22  |

## b. HGVS syntax search matrix

| Search                                             | Result - PubMed           | Result - Google                                 |
|----------------------------------------------------|---------------------------|-------------------------------------------------|
| PROK2 297dup                                       | (nothing)                 | LOVD entry from ESP                             |
| PROK2 Gly100Trpfs OR Gly100fs OR G100Wfs OR G100fs | (nothing)                 | LOVD entry from ESP; Dissertation in Portuguese |
| PROK2 234dup                                       | (nothing)                 | (nothing)                                       |
| PROK2 Gly79Trpfs OR Gly79fs OR G79Wfs OR G79fs     | (nothing)                 | Link to company primer assay webpage            |
| <b>PROK2 G100fsX121</b>                            | <b>Abreu et al., 2008</b> | <b>Abreu et al., 2008; other review papers</b>  |

## c. Spider-webbing to evidence and classification

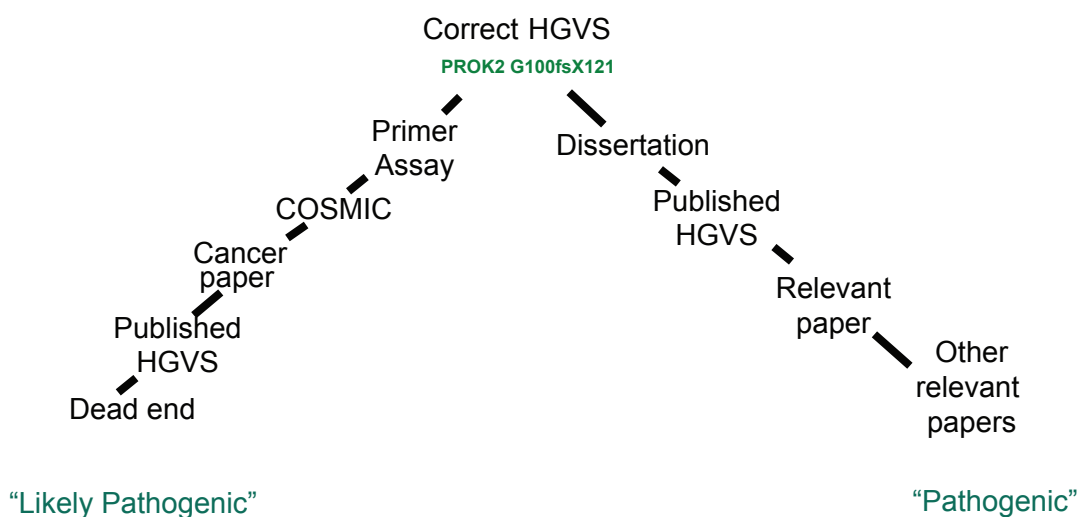

Supplement: Supplementary file [file 054023-2.pdf]
